# Supplementary material for: Nitrosative Stress in Astronaut Skeletal Muscle in Spaceflight
Source: MDPI journal article supplement (doi:10.3390/antiox13040432), 2024-04-02
Supplement: s1 [file s1]

## Supplementary Materials

**Figure S1.** Nitro-DIGE gel images of SOLEUS muscle extracts from SDM / LDM Astronauts

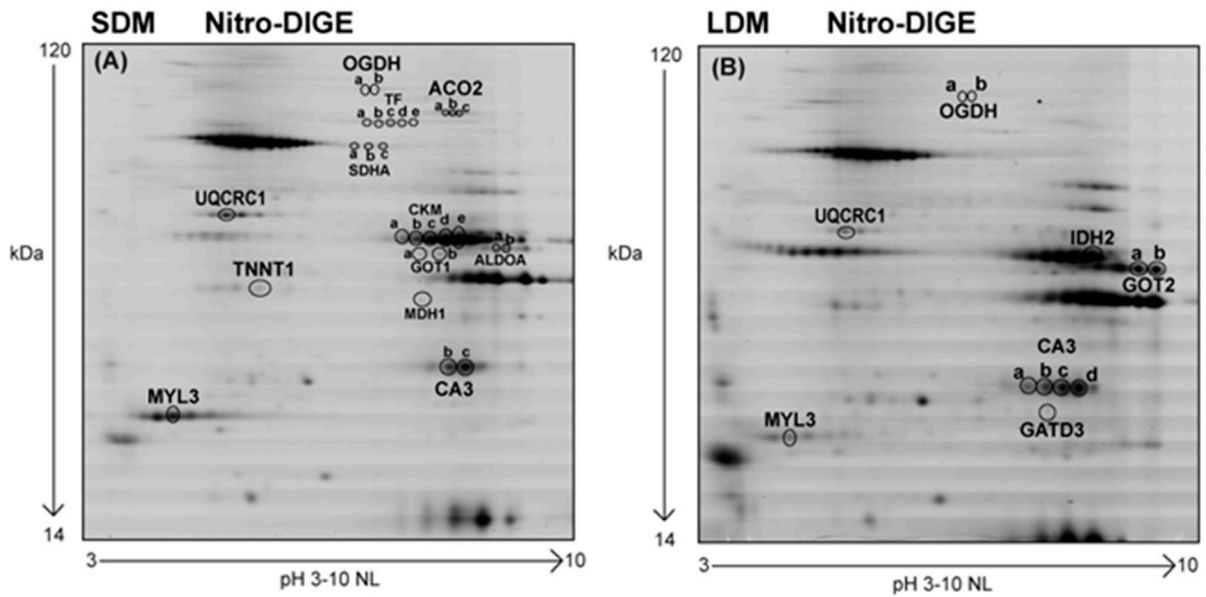

**Figure S1.** Nitro-DIGE gel images of SOL muscle protein extracts from one short-duration (9 days on ISS, without inflight exercise; acute  $\mu\text{G}$  exposure) and four long-duration (> 6 month or more on ISS, with routine inflight exercise; chronic  $\mu\text{G}$  exposure) mission astronauts (SDM, left panel; LDM, right panel). Protein extracts (20  $\mu\text{g}$  for each sample) were run in duplicate using 24 cm, 3–10 non-linear immobilized pH-gradient (IPG) strips. Isoelectric focusing was performed on an IPGphor electrophoresis unit (GE Healthcare) using a gradient ranging from 200 to 8000 V, reaching a total of 75,000 Vh. Focused proteins were reduced and alkylated prior to second dimension electrophoretic run. Second dimension was performed on 20x25 cm<sup>2</sup>, 12% T, 2.5% C constant concentration polyacrylamide gels at 20 C and 15 mA using the Ettan Dalt II system (GE Healthcare). Images of CyDye-labeled gels were acquired using a Typhoon 9200 Imager (GE Healthcare), and image analysis was performed using DeCyder software (version 6.5, GE Healthcare). Gel images show nitrosylated spots. Changes in nitrosylation levels were assessed for each protein by normalizing the Nitro-DIGE level to the previously published label-free LC-MS/MS abundance data set performed on the same subjects. **(Left panel)** Among 111 nitrosylated spots, 28 were identified as differentially nitrosylated in pre *vs* postflight SDM. Proteoforms of fructose-bisphosphate aldolase A (ALDOA), proteoforms of aconitate hydratase (ACO2), proteoforms of cytoplasmic aspartate aminotransferase (GOT1), proteoforms of succinate dehydrogenase [ubiquinone] flavoprotein subunit (SDHA), proteoforms of 2-oxoglutarate dehydrogenase complex component E2 (OGDH), cytochrome b-c1 complex subunit 1 (UQCRC1), cytoplasmic malate dehydrogenase (MDH1), proteoforms of creatine kinase M-type (CKM), myosin light chain 3 (MYL3), slow skeletal muscle troponin T (TNNT1), proteoforms of serotransferrin (TF), and proteoforms of carbonic anhydrase 3 (CA3). **(Right panel)** Among 111 nitrosylated spots, 12 were identified as differentially nitrosylated in pre *vs* postflight LDM. UQCRC1, isocitrate dehydrogenase [NADP] (IDH2), proteoforms of OGDH, proteoforms of mitochondrial aspartate aminotransferase (GOT2), glutamine amidotransferase-like class 1 domain-containing protein 3 (GATD3), proteoforms of CA3, and MYL3.

**Table S1.** List of identified proteins in Short Duration Mission (SDM) group by NITRO-DIGE and label-free LC-MS/MS analysis.

| Table S1. List of identified proteins in Short Duration Mission (SDM) group by NITRO-DIGE and label-free LC-MS/MS analysis. |            |                                                                          |            |                            |                               |                            |
|-----------------------------------------------------------------------------------------------------------------------------|------------|--------------------------------------------------------------------------|------------|----------------------------|-------------------------------|----------------------------|
|                                                                                                                             |            |                                                                          | NITRO DIGE |                            |                               |                            |
|                                                                                                                             |            |                                                                          | LABEL FREE |                            |                               |                            |
|                                                                                                                             |            |                                                                          | NITRO DIGE | LABEL FREE                 |                               |                            |
| Protein IDs                                                                                                                 | Gene names | Protein Name                                                             | T-test SDM | % fold change POST/PRE SDM | Student's T-test POST/PRE SDM | % fold change POST/PRE SDM |
| P04075                                                                                                                      | ALDOA a    | Fructose-bisphosphate aldolase A                                         | 0,381      | 24                         | 0,0325902                     | -2,58                      |
| P04075                                                                                                                      | ALDOA b    | Fructose-bisphosphate aldolase A                                         | 0,408      | 24                         |                               |                            |
| Q99798                                                                                                                      | ACO2 a     | Aconitate hydratase, mitochondrial                                       | 0,0135     | 47                         | 0,0245542                     | -16,91                     |
| Q99798                                                                                                                      | ACO2 b     | Aconitate hydratase, mitochondrial                                       | 4,22E-03   | 52                         |                               |                            |
| Q99798                                                                                                                      | ACO2 c     | Aconitate hydratase, mitochondrial                                       | 1,75E-03   | 42                         |                               |                            |
| P17174                                                                                                                      | GOT1 a     | Aspartate aminotransferase, cytoplasmic                                  | 0,448      | 45                         | 0,0422065                     | -14,90                     |
| P17174                                                                                                                      | GOT1 b     | Aspartate aminotransferase, cytoplasmic                                  | 0,22       | 47                         |                               |                            |
| P31040                                                                                                                      | SDHA a     | Succinate dehydrogenase [ubiquinone] flavoprotein subunit, mitochondrial | 0,131      | 38                         | 0,0294336                     | -17,67                     |
| P31040                                                                                                                      | SDHA b     | Succinate dehydrogenase [ubiquinone] flavoprotein subunit, mitochondrial | 0,0504     | 57                         |                               |                            |
| P31040                                                                                                                      | SDHA c     | Succinate dehydrogenase [ubiquinone] flavoprotein subunit, mitochondrial | 0,0231     | 65                         |                               |                            |
| Q02218                                                                                                                      | OGDH a     | 2-oxoglutarate dehydrogenase complex component E1                        | 0,126      | 43                         | 0,0128131                     | -13,04                     |
| Q02218                                                                                                                      | OGDH b     | 2-oxoglutarate dehydrogenase complex component E2                        | 0,126      | 28                         |                               |                            |
| P31930                                                                                                                      | UQCRC1     | Cytochrome b-c1 complex subunit 1, mitochondrial                         | 0,0852     | 31                         | 0,0314967                     | -16,88                     |
| P40925                                                                                                                      | MDH1       | Malate dehydrogenase, cytoplasmic                                        | 0,793      | 14                         | 0,0307787                     | -22,56                     |
| P06732                                                                                                                      | CKM a      | Creatine kinase M-type                                                   | 0,12       | 30                         | 0,0369019                     | -10,73                     |
| P06732                                                                                                                      | CKM b      | Creatine kinase M-type                                                   | 0,0992     | 22                         |                               |                            |
| P06732                                                                                                                      | CKM c      | Creatine kinase M-type                                                   | 0,16       | 15                         |                               |                            |
| P06732                                                                                                                      | CKM d      | Creatine kinase M-type                                                   | 0,5        | 9                          |                               |                            |
| P06732                                                                                                                      | CKM e      | Creatine kinase M-type                                                   | 0,458      | 9                          |                               |                            |
| P08590                                                                                                                      | MYL3       | Myosin light chain 3                                                     | 6,22E-03   | 60                         | 0,0314967                     | -22,74                     |
| P13805                                                                                                                      | TNNT1      | Troponin T, slow skeletal muscle                                         | 0,0817     | 33                         | 0,0129625                     | -25,31                     |
| P02787                                                                                                                      | TF a       | Serotransferrin                                                          | 0,093      | 29                         | 0,0226543                     | -17,04                     |
| P02787                                                                                                                      | TF b       | Serotransferrin                                                          | 8,27E-03   | 38                         | 0,0226543                     | -17,04                     |
| P02787                                                                                                                      | TF c       | Serotransferrin                                                          | 0,0599     | 43                         |                               |                            |
| P02787                                                                                                                      | TF d       | Serotransferrin                                                          | 0,0402     | 49                         |                               |                            |
| P02787                                                                                                                      | TF e       | Serotransferrin                                                          | 0,0248     | 53                         |                               |                            |
| P07451                                                                                                                      | CA3 b      | Carbonic anhydrase 3                                                     | 0,0284     | 45                         | 0,120365                      | -14,44                     |
| P07451                                                                                                                      | CA3 c      | Carbonic anhydrase 3                                                     | 0,0204     | 37                         |                               |                            |

**Table S2.** List of identified proteins in Long Duration Mission (LDM) group by NITRO-DIGE and label-free LC-MS/MS analysis.

| Table S2. List of identified proteins in Long Duration Mission (LDM) group by NITRO-DIGE and label-free LC-MS/MS analysis. |            |                                                                                    |                   |                            |                            |                            |
|----------------------------------------------------------------------------------------------------------------------------|------------|------------------------------------------------------------------------------------|-------------------|----------------------------|----------------------------|----------------------------|
|                                                                                                                            |            |                                                                                    | NITRO DIGE        |                            |                            |                            |
|                                                                                                                            |            |                                                                                    | LABEL FREE        |                            |                            |                            |
|                                                                                                                            |            |                                                                                    | NITRO DIGE        | LABEL FREE                 |                            |                            |
| Protein IDs                                                                                                                | Gene names | Protein Name                                                                       | Paired T-test LDM | % fold change LDM POST/PRE | Paired T-test POST/PRE LDM | % fold change POST/PRE LDM |
| P31930                                                                                                                     | UQCRC1     | Cytochrome b-c1 complex subunit 1, mitochondrial                                   | 0,007040          | -22                        | 0,0073591                  | 17,74                      |
| P48735                                                                                                                     | IDH2       | Isocitrate dehydrogenase [NADP], mitochondrial                                     | 0,423             | 35                         | 0,000236415                | -15,37                     |
| Q02218                                                                                                                     | OGDH a     | 2-oxoglutarate dehydrogenase complex component E1                                  | 0,977             | 11                         | 0,0193319                  | -7,86                      |
| Q02218                                                                                                                     | OGDH b     | 2-oxoglutarate dehydrogenase complex component E2                                  | 0,958             | 13                         |                            |                            |
| P00505                                                                                                                     | GOT2 a     | Aspartate aminotransferase, mitochondrial                                          | 0,726             | 36                         | 0,000243915                | -14,91                     |
| P00505                                                                                                                     | GOT2 b     | Aspartate aminotransferase, mitochondrial                                          | 0,812             | 28                         |                            |                            |
| P0DP12                                                                                                                     | GATD3      | Glutamine amidotransferase-like class 1 domain-containing protein 3, mitochondrial | 0,109             | 54                         | 0,000715169                | -20,77                     |
| P07451                                                                                                                     | CA3 a      | Carbonic anhydrase 3                                                               | 0,284             | 36                         | 0,000246763                | -19,71                     |
| P07451                                                                                                                     | CA3 b      | Carbonic anhydrase 3                                                               | 0,297             | 17                         |                            |                            |
| P07451                                                                                                                     | CA3 c      | Carbonic anhydrase 3                                                               | 0,699             | 3                          |                            |                            |
| P07451                                                                                                                     | CA3 d      | Carbonic anhydrase 3                                                               | 0,928             | 2                          |                            |                            |
| P08590                                                                                                                     | MYL3       | Myosin light chain 3                                                               | 0,368             | 54                         | 0,000321484                | -31,81                     |
